# Supplementary material
Source: HighWire-hosted journal article supplement (https://svn.smart01.highwire.org/content/9/1/18)

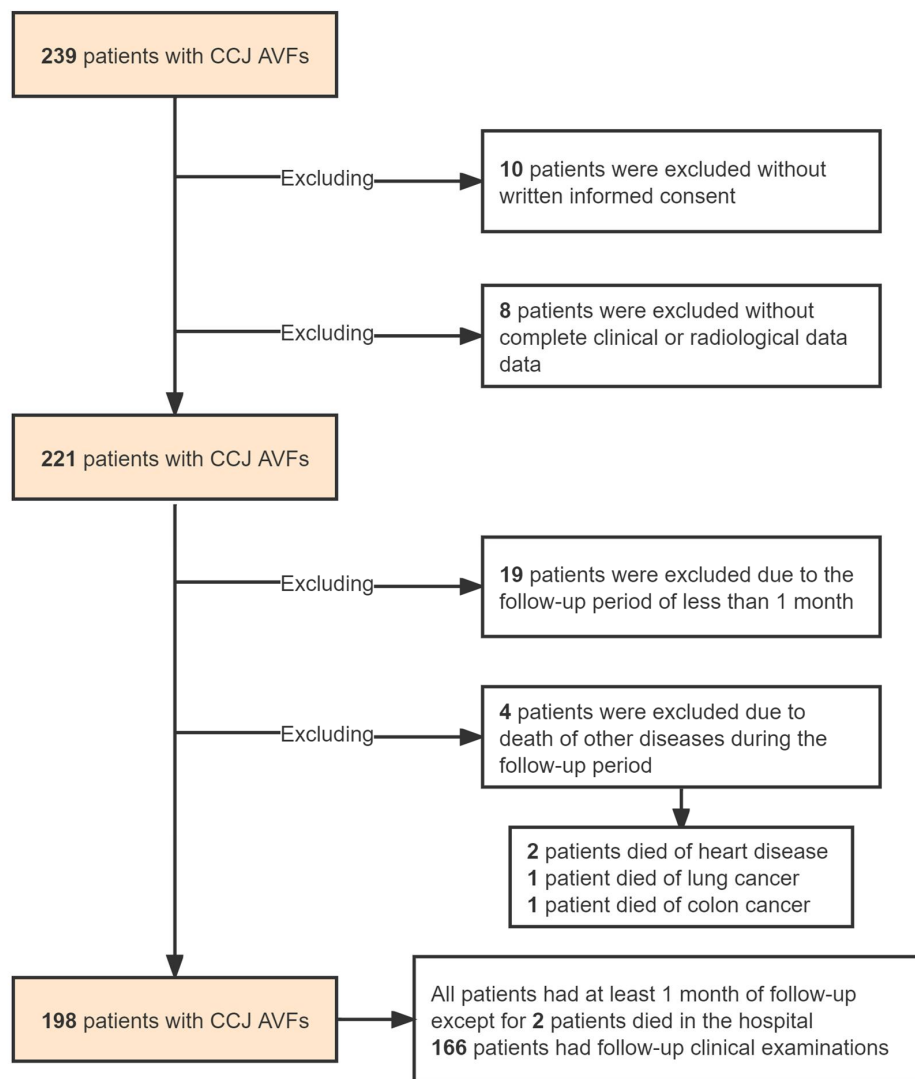

**Supplemental Figure 1.** Research flow chart of the included participants.

Supplement: inline-supplementary-material-6 [file inline-supplementary-material-6.pdf]
